# Supplementary material for: Responsive disassembly of the gold nanoparticle aggregates triggered by the competitive adsorption for lighting up the colorimetric sensing
Source: Royal Society of Chemistry journal article supplement (doi:10.1039/c3ay40175h), 2013-01-01
Supplement: c3ay40175h.pdf [file c3ay40175h.pdf]

## Electronic Supplementary Information

# Responsive disassembly of the gold nanoparticle aggregates triggered by the competitive adsorption for lighting up the colorimetric sensing

Yali Liu,<sup>a</sup> Yamei Yang,<sup>a</sup> Xijuan Zhao,<sup>a</sup> Zhongde Liu,<sup>\*b</sup> and Yuanfang Li<sup>\*a</sup>

<sup>a</sup> Education Ministry Key Laboratory on Luminescence and Real-Time Analysis, School of Chemistry and Chemical Engineering, Southwest University, Chongqing 400715, China. E-mail:

liyf@swu.edu.cn, Tel: (+86) 23 68254659, Fax: (+86) 23 68367257.

<sup>b</sup> College of Pharmaceutical Science, Southwest University, Chongqing 400716, China

### Additional figures

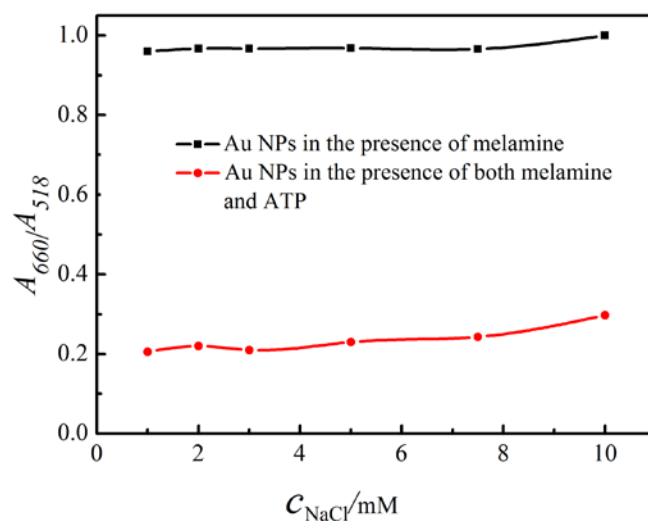

**Fig. S1.** The effect of ionic strength on the ATP-triggered disassembly of the melamine-crosslinked gold nanoparticle aggregates. Concentration: AuNPs, 2.6 nM; melamine, 1.0  $\mu\text{M}$ ; ATP 0.24  $\mu\text{M}$ . pH 4.2.
